# Expression of Estrogen Receptor $\beta$ Is Developmentally Regulated in Reproductive Tissues of Male and Female Mice

Wendy N. Jefferson,<sup>2</sup> John F. Couse,<sup>3</sup> Elizabeth Padilla Banks,<sup>2</sup> Kenneth S. Korach,<sup>3</sup> and Retha R. Newbold<sup>1,2</sup>

*Developmental Endocrinology Section,<sup>2</sup> Reproductive Toxicology Group, Laboratory of Toxicology, Environmental Toxicology Program and Receptor Biology Section,<sup>3</sup> Laboratory of Reproductive and Developmental Toxicology, Environmental Diseases and Medicine Program, National Institute of Environmental Health Sciences, Research Triangle Park, North Carolina 27709*

## ABSTRACT

By the use of ribonuclease protection assay (RPA) combined with immunohistochemical techniques, the expression of estrogen receptor (ER)  $\alpha$  and ER $\beta$  was mapped in the developing gonads and reproductive tracts of male and female mice from fetal day 14 to postnatal day 26 (PND 26). This study was designed to determine the pattern of expression of both ER subtypes in specific tissue compartments during development. In ovaries, ER $\alpha$  mRNA was detected at all ages examined; ER $\beta$  mRNA was seen as early as PND 1, and its expression increased with age. Immunolocalization showed ER $\beta$  in differentiating granulosa cells of the ovary, whereas ER $\alpha$  was predominantly seen in interstitial cells. The remainder of the female reproductive tract showed ER $\alpha$  mRNA at all ages examined with little or no significant levels of ER $\beta$ , except on PND 1 when a low level of message appeared. In males, ER $\alpha$  and ER $\beta$  mRNA were detected in the fetal testis; however, ER $\beta$  gradually increased until PND 5 and subsequently diminished to undetectable levels by PND 26. Immunolocalization showed ER $\alpha$  in the interstitial compartment of the testis, whereas ER $\beta$  was seen predominantly in developing spermatogonia. The remainder of the male reproductive tract showed varying amounts of both receptors by RPA and immunostaining throughout development. These studies provide information useful in studying the role of both ER subtypes in normal differentiation, and they provide indications of differential tissue expression during development.

## INTRODUCTION

Estrogens are known to regulate cell functions such as growth and differentiation in target tissues via receptor-mediated pathways. Until recently, only a single type of estrogen receptor (ER) was thought to exist and to mediate the genomic effects of estrogens [1]. However, reports have now described a second ER, termed ER $\beta$  [2,3], that has been shown to exhibit a tissue distribution distinct from the classical ER (now termed ER $\alpha$ ) [4–6]. The biological significance of two ER subtypes is unclear but may provide an explanation for the selective actions of estrogens in different target tissues. The fact that both ER $\alpha$  and ER $\beta$  are found in numerous mammalian species suggests that selective effects of estrogens may reside in promoters that are differentially responsive to ER $\alpha$  and ER $\beta$ .

The ontogeny of ER $\alpha$  in the developing reproductive tract of a number of species has been documented for many years [7–10]. The presence of ER $\beta$  has only recently been described in adult reproductive tract tissues of mice [4,11], rats [12–14], cows [15], and humans [3,16]. Developmental expression of ER $\beta$  has been reported in the prostate [17] and testis [18,19] of the rat, and in the fetal reproductive tract of humans [5]. ER $\beta$  has also been reported in several reproductive tract tissues of the mouse during embryogenesis [20]. Our particular interest has been in the expression of the two ER forms in the developing reproductive tract tissues of male and female mice. Since the differentiating mammalian reproductive tract has been shown to be uniquely sensitive to various estrogenic compounds, and exposure either prenatally or neonatally results in long-term abnormalities including neoplasia [21–23], the role of both ER $\alpha$  and ER $\beta$  in the induction of these lesions warrants further investigation. Synthetic and naturally occurring xenoestrogens have different relative in vitro affinities for ER $\beta$  and ER $\alpha$  receptors, and some ligands preferentially bind to ER $\alpha$ , whereas others bind more efficiently to ER $\beta$  [24–26]. Therefore, the presence and relative abundance of both ER $\alpha$  and ER $\beta$  in a specific tissue may be a determining factor in the relative effect of a particular compound on that tissue. The present study describes ER $\alpha$  and ER $\beta$  mRNA and protein expression in specific tissue compartments of reproductive tract tissues in male and female mice at various stages of normal development and differentiation.

## MATERIALS AND METHODS

### Animals

Adult CD-1 (CrI:CD-1 [ICR] BR) mice were obtained from Charles River Breeding Laboratories (Raleigh, NC) and bred to male mice of the same strain in the breeding facility at the National Institute of Environmental Health Sciences (NIEHS; Research Triangle Park, NC). Vaginal plug detection was considered day 0 of pregnancy. Pregnant mice were housed under controlled lighting (12L:12D) and temperature (21–22°C) conditions. Mice were provided with NIH 31 laboratory mouse chow (National Institutes of Health, Bethesda, MD, purchased from Zeigler Brothers, Inc., Gardners, PA) and fresh water ad libitum. All animal procedures complied with an approved NIEHS/NIH animal care protocol.

Pregnant mice were killed and fetuses were removed at 14 and 16 days postconception (dpc; plug day = 0 dpc). For the remaining time points, pregnant mice delivered their young on 19 dpc and were randomly standardized to

<sup>1</sup>Correspondence: Retha R. Newbold, Mail Drop E4-02, NIEHS, 111 Alexander Drive, South Campus, P.O. Box 12233, Research Triangle Park, NC 27709. FAX: 919 541 4634; e-mail: newbold1@niehs.nih.gov

Received: 12 May 1999.

First decision: 11 June 1999.

Accepted: 14 September 1999.

© 2000 by the Society for the Study of Reproduction, Inc.

ISSN: 0006-3363. <http://www.biolreprod.org>

8 pups per litter. Mice were killed on days 1, 5, 12, 19, and 26 of life (day of birth = postnatal day [PND] 1).

Reproductive tract tissues were quickly removed and processed by one of two methods: 1) tissues collected for ribonuclease protection assay (RPA) were snap-frozen in liquid nitrogen and stored at  $-70^{\circ}\text{C}$  until further processed; 2) tissues collected for immunohistochemical analysis were fixed in formalin for 6 h at  $4^{\circ}\text{C}$ , transferred to 70% ethyl alcohol at  $4^{\circ}\text{C}$ , and processed for histological evaluation. Tissues were embedded in paraffin and serially cut into 4- $\mu\text{m}$  sections.

#### RNA Isolation and RPA

**RNA isolation.** For fetal tissue collection, 6 pregnant females were killed at each time point (14 dpc and 16 dpc); the abdominal cavity was opened, and fetuses were quickly removed. Using a dissecting scope, the reproductive tract was collected en bloc into cold PBS, and the gonad was dissected away from the remainder of the reproductive tract. Reproductive tracts and gonads were frozen and pooled from approximately 30 female and 30 male mice for each age. At PNDs 1, 5, 12, 19, and 26, reproductive tracts and gonads were collected into cold PBS, dissected, and frozen. Approximately 8 mice per sex per time point were pooled on PNDs 1, 5, and 12, and 4 mice per sex per time point were pooled on PNDs 19 and 26. Tissues collected from the females included ovary/oviduct and uterus; tissues from the males were testis, epididymis, vas deferens, seminal vesicle, and coagulating gland complex, and the remainder of the reproductive tract including the prostate. For PND 1 males, seminal vesicles were not separated from reproductive tract tissues.

Tissues were pulverized and homogenized with a hand-held homogenizer in Trizol (Gibco-BRL, Grand Island, NY), and total RNA was isolated according to the manufacturer's instructions. A small aliquot of the final preparation was used to determine the amount of total RNA by  $A_{260}$ , and the integrity of the RNA was checked on 1% agarose gels by viewing ribosomal RNA bands. RNA was frozen at  $-70^{\circ}\text{C}$  until further use.

**RPA.** The probes used in this study have been previously described in detail [4,27]. Antisense riboprobes were generated from linearized templates using Maxiscript reagents (Ambion, Austin, TX), the appropriate RNA polymerase (T3 or T7), and the incorporation of [ $^{32}\text{P}$ ]CTP (Amersham Pharmacia Biotech, Piscataway, NJ) according to the manufacturer's protocol. The full-length mouse ER $\alpha$  antisense riboprobe was 490 nucleotides (nt) and produced a specific protected fragment of 366 nt [27]. The mouse ER $\beta$  antisense riboprobe was generated from the cloned cDNA fragment and was 318 nt in full length and generated a protected fragment of 262 nt [4]. An antisense riboprobe specific for mouse cyclophilin, used to equate loading among lanes, was generated from the template pTRI-cyclophilin (Ambion) at a full length of 165 nt and produced a protected fragment of 103 nt.

For all postnatal endpoints, 10  $\mu\text{g}$  of total RNA was used, and for the fetal end points 2.5  $\mu\text{g}$  was used. All RPA reactions consisted of  $5 \times 10^4$  cpm of each probe, sample RNA, and yeast tRNA (for a final total RNA equal to 25  $\mu\text{g}$ ), which were mixed and ethanol-precipitated at  $-70^{\circ}\text{C}$  for a minimum of 3 h to a maximum of overnight. The resulting pellets were then processed through the RPA using the Hybspeed RPA reagents (Ambion) according to the manufacturer's protocol. Final analysis of protected frag-

ments was carried out by electrophoresis on a 1.5-mm-thick, 6% bis-acrylamide/8.3 M urea/single-strength Tris-borate-EDTA (TBE) gel (National Diagnostics, Atlanta, GA), which was then fixed, dried, and exposed to a Phosphorimager screen (Molecular Dynamics, Sunnyvale, CA) and then to x-ray film.

#### ER Immunohistochemistry

**ER $\alpha$ .** Tissue sections from a minimum of three mice were immunostained for each age and sex. Tissue sections were deparaffinized in xylene, hydrated in a series of graded ethanols, and washed in single-strength automation buffer (AB; Fisher Scientific, Norcross, GA). Sections were then treated with 3% hydrogen peroxide to eliminate endogenous peroxidase. After washes in AB, sections were incubated with 0.015 mg/ml trypsin in AB for 4 min and with 0.025 mg/ml deoxyribonuclease I in AB for 3 min, and washed with AB. Sections were then incubated with normal goat serum (Vector Laboratories, Burlingame, CA) to block nonspecific binding for 20 min. The sections were then incubated with primary antibody, rat anti-human ER $\alpha$  (H222; Abbott Laboratories, Chicago, IL) at a dilution of 1:3 overnight at room temperature. Negative controls were run on adjacent tissue sections with preimmune serum (Abbott Laboratories) or without the primary antibody (buffer only). Sections were then washed with AB and incubated with biotinylated goat anti-rat IgG (Vector Laboratories) for 1 h. After this incubation, sections were washed and incubated with ExtrAvidin peroxidase (Sigma Chemical Company, St. Louis, MO) at a dilution of 1:50 for 30 min. Visualization of the peroxidase was carried out by covering the sections with diaminobenzidine (DAB; Sigma Chemical Company) at 0.5 mg/ml in AB containing 0.01%  $\text{H}_2\text{O}_2$  for 10 min. Sections were rinsed in distilled water and dehydrated in a graded series of ethanols and xylenes, and coverslipped for evaluation by light microscopy.

**ER $\beta$ .** Adjacent tissue sections of the samples immunostained for ER $\alpha$  were also immunostained for ER $\beta$ . Sections were deparaffinized and rehydrated, and endogenous peroxidase was eliminated as described for ER $\alpha$  above. After washes in AB, tissue sections were rinsed with water and microwaved for 5 min in  $\text{dH}_2\text{O}$  for antigen retrieval. Sections were then incubated with 10% BSA in AB for 20 min, then incubated 2 h at room temperature using rabbit anti-mouse ER $\beta$  at a dilution of 1:50 in AB pH 6.8 (310; Affinity Bioreagents, Golden, CO). Negative controls of adjacent tissue sections were incubated with anti-mouse ER $\beta$  preabsorbed with ER $\beta$  peptide (Affinity Bioreagents), or preimmune serum at the same dilution. Sections were then washed with AB and incubated with biotinylated goat anti-rabbit IgG (Vector Laboratories) at a concentration of 1:500 in AB for 1 h. Sections were washed with AB and incubated with ExtrAvidin peroxidase for 30 min, and treated with DAB in AB containing 1%  $\text{H}_2\text{O}_2$  for 10–20 min for color development. Sections were rinsed in distilled water, dehydrated, coverslipped, and evaluated using light microscopy.

## RESULTS

### RPA

Two distinct bands differing in size by approximately 15 nt appeared in several tissues although a single protected fragment representative of ER $\beta$  mRNA was expected. It is important to note that these bands appeared only in those

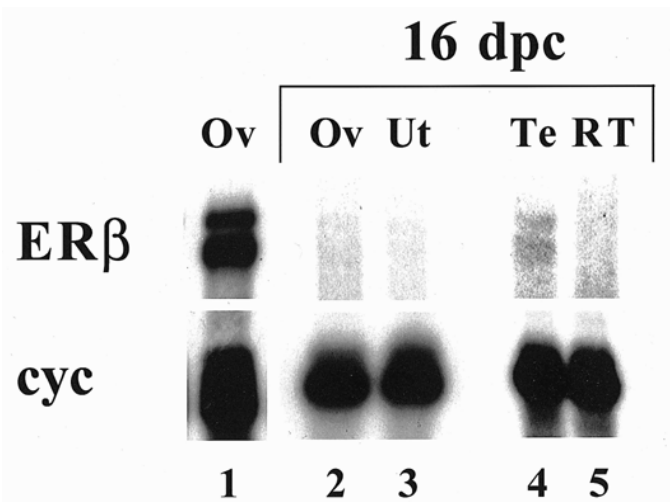

FIG. 1. RPA results of 16 dpc male and female reproductive tract tissues. 2.5  $\mu$ g of total RNA was used in each RPA for each fetal tissue. Lane 1: PND 19 ovaries (Ov; 10  $\mu$ g total RNA, positive control); lanes 2–5: ovaries (Ov); uteri (Ut); testes (Te); reproductive tracts (RT). ER $\beta$  mRNA was seen in the 16 dpc testis sample only. Cyclophilin (cyc) in each gel demonstrates that the total RNA was comparable for the fetal samples in each gel. The film in this figure was exposed overnight for ER $\beta$  in the fetal samples and 8 h for cyclophilin and ER $\beta$  in the PND 19 control ovaries.

tissues that also exhibited positive ER $\beta$  immunoreactivity, and therefore both are probably representative of detectable ER $\beta$  mRNA. As described previously [2], the ER $\beta$  riboprobe was transcribed from a partial cDNA clone of the mouse ER $\beta$  gene generated by PCR using primers specific to the rat ER $\beta$  gene. Because the rat primers become incorporated into the clone during this process and are not 100% homologous to the corresponding mouse sequences, there exist some degenerate sequences in the termini of the clone and resulting riboprobe. This small difference in the riboprobe and protected mRNA sequence can be partially exploited during the ribonuclease (RNase) step of the assay, resulting in incomplete RNase digestion and the appearance of two bands.

The results of the RPA on the fetal tissues are shown in Figure 1; 16 dpc ovaries and uteri showed no detectable ER $\beta$  mRNA, whereas 16 dpc testes did show the presence of ER $\beta$  mRNA; the remainder of the male reproductive tract showed no evidence of ER $\beta$  transcripts. ER $\alpha$  transcripts were detected in all male and female 16 dpc tissues examined by RPA (data not shown). Total RNA from the 14 dpc testis was positive for ER $\beta$  mRNA expression (data not shown).

The results of the RPA on postnatal female tissues are shown in Figure 2. All time points showed the presence of both ER $\alpha$  and ER $\beta$  mRNA in the ovaries, with a peak in ER $\beta$  mRNA transcripts at PND 19. The uteri showed ER $\alpha$  at all ages examined; a low level of ER $\beta$  was seen in the uterus on PND 1 but was not apparent in older tissues. Longer exposure time (2 days) did not reveal ER $\beta$  mRNA in the uterus at later ages.

Results of RPA analysis of ER $\alpha$  and ER $\beta$  mRNA in male tissues are seen in Figure 3. The neonatal testis showed the presence of ER $\alpha$  that decreased with age starting on PND 19. An abundant amount of ER $\beta$  mRNA was seen on PNDs 1 and 5. Although ER $\beta$  mRNA was present at later time points, levels were relatively much lower. RPA analysis of the remainder of the reproductive tract showed

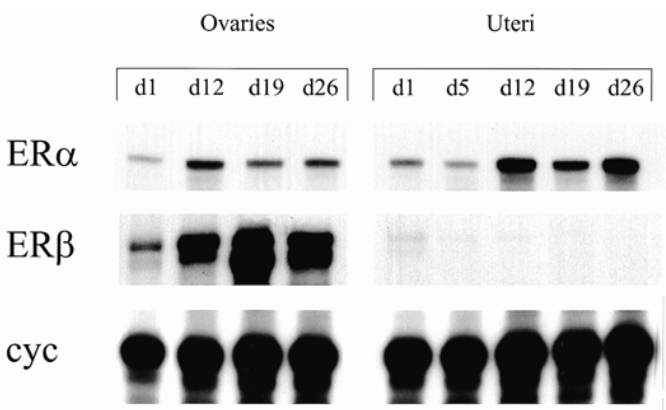

FIG. 2. RPA results for all postnatal female reproductive tract tissues. **Left (Ovaries)** Pooled ovarian RNA (10  $\mu$ g) from animals on PND 1, 12, 19, and 26 were assayed. The presence of both ER $\alpha$  and ER $\beta$  transcripts was apparent in all ovary samples examined, showing an increase in ER $\beta$  mRNA with increasing age of the animal. **Right (Uteri)** Pooled uterine mRNA (10  $\mu$ g) from animals on PND 1, 5, 12, 19, and 26 shows an abundant amount of ER $\alpha$  mRNA and little or no expression of ER $\beta$  mRNA with the exception of the PND 1 uteri. Cyclophilin (cyc) in ovarian and uterine samples demonstrates that the total RNA was comparable for all samples compared. The film in this figure was exposed overnight for ER $\alpha$  and ER $\beta$  and 8 h for cyclophilin.

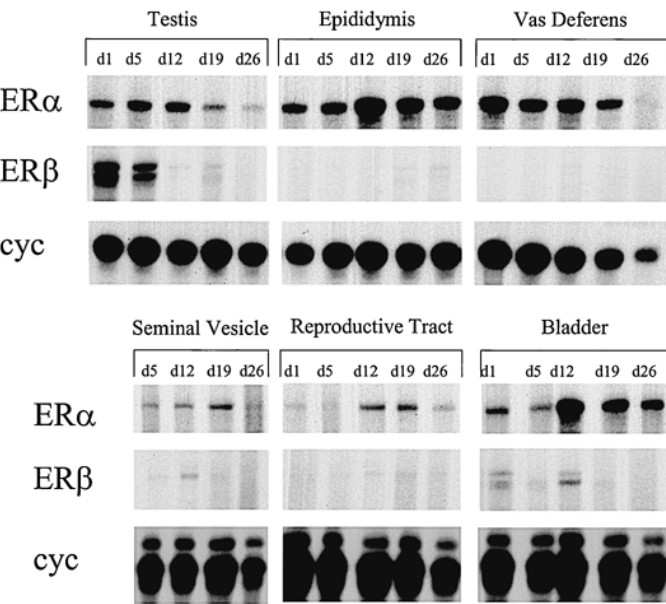

FIG. 3. RPA results for all postnatal male reproductive tract tissues. For each sample shown, 10  $\mu$ g of total RNA was assayed. **Top**) Results for the testis, epididymis, and vas deferens. ER $\alpha$  mRNA was present in the testes, with decreasing mRNA levels with increasing age of the animal. ER $\alpha$  mRNA was also present in the epididymis and vas deferens at all ages examined, although at PND 26 an apparent decrease in mRNA in the vas deferens was seen. There was abundant ER $\beta$  mRNA in the PND 1 and PND 5 testis. ER $\beta$  was present at later time points; however, mRNA levels were relatively much lower. Although it is not apparent from this figure, ER $\beta$  was present in the epididymis and the vas deferens and can be more clearly seen in a longer exposure. **Bottom**) The results for the seminal vesicle, reproductive tract, and bladder. ER $\alpha$  and ER $\beta$  transcripts were detected in all samples assayed. Cyclophilin (cyc) demonstrates that the total RNA was comparable for all samples compared except PND 26 vas. The film was exposed overnight for ER $\alpha$  and ER $\beta$  and 8 h for cyclophilin.



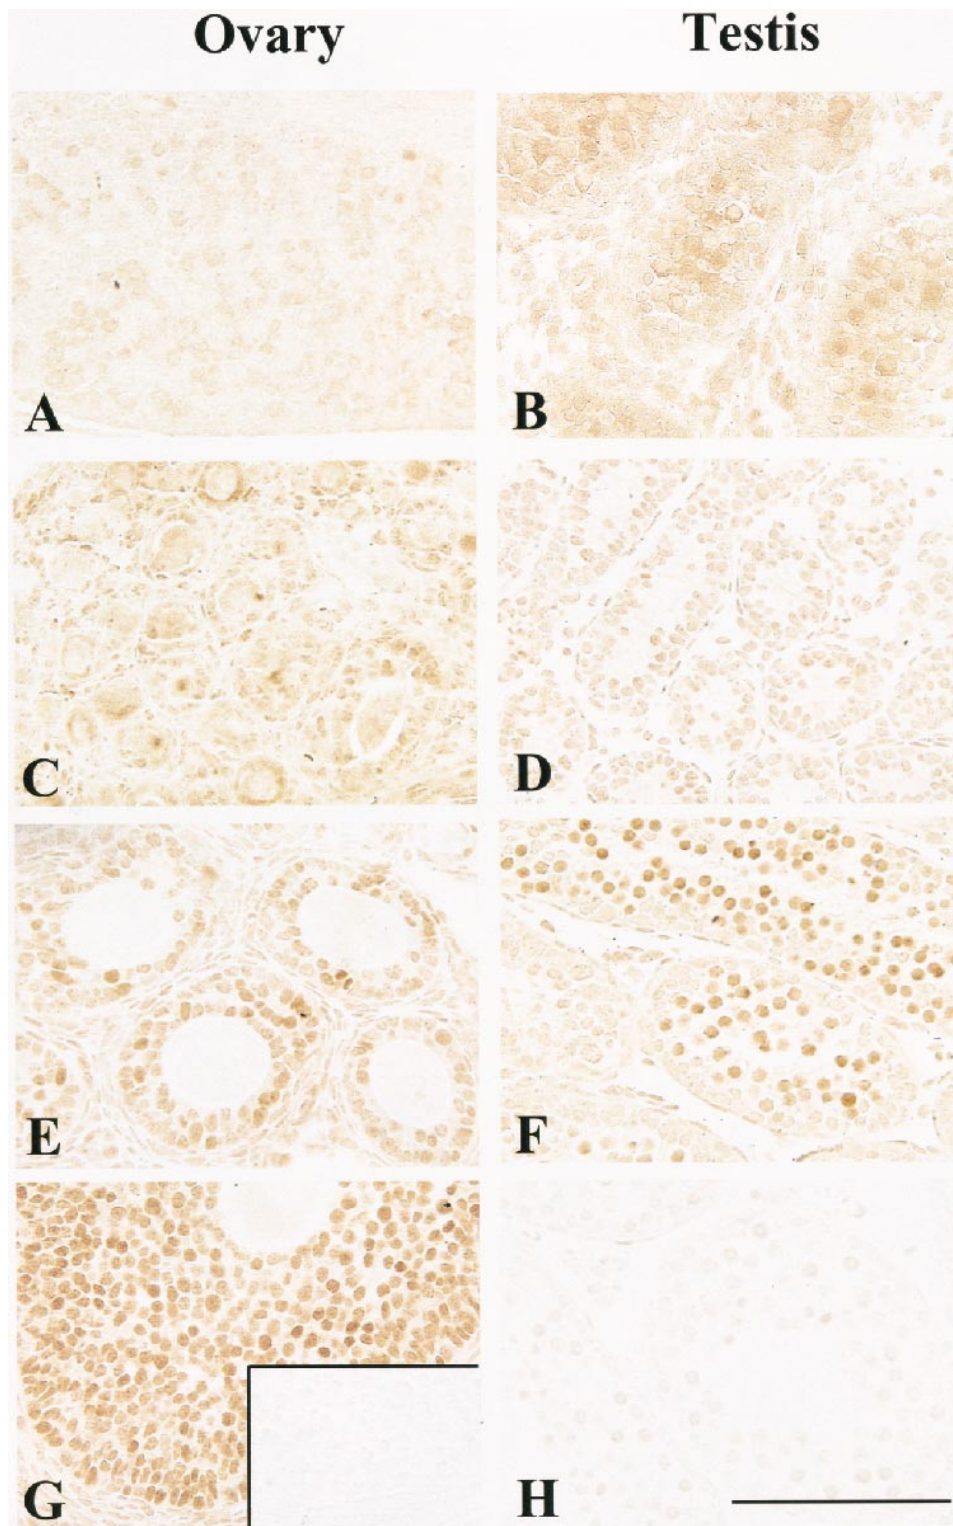

FIG. 4. Immunohistochemical analysis of ER $\beta$  in the developing ovary (left panels) and testis (right panels) at 16 dpc (**A** and **B**), and at PNDs 5 (**C,D**), 12 (**E,F**), and 26 (**G,H**). In the fetal ovary (**A**), there was no detectable ER $\beta$  immunoreactivity. ER $\beta$  immunoreactivity could be detected by PND 5 (**C**) and increased with the age of the animal, with the most abundant expression in the nucleus of the granulosa cells of the PND 26 ovary (**G**). ER $\beta$  immunoreactivity was detected in the testis at 16 dpc (**B**), PND 5 (**D**), and PND 12 testis (**F**), most predominantly in the spermatocytes on PND 12. There was little detection in the testis by PND 26 (**H**). The negative control for this immunostaining can be seen in the inset of **G**. The bar in **H** represents 100  $\mu$ m, and all images are shown at the same magnification.

detectable ER $\alpha$  mRNA in the epididymis, vas deferens, seminal vesicle, reproductive tract (including the prostate), and bladder; varying levels of ER $\beta$  were seen in the same tissues (Fig. 3). Although not readily apparent in Figure 3, longer exposure times (2 days) revealed faint ER $\beta$  bands in the vas deferens and the epididymis (data not shown). The bladder also demonstrated the presence of ER $\alpha$  and ER $\beta$  mRNA early in development at varying levels for both transcripts.

#### Immunohistochemistry

Immunohistochemical localization of ER $\beta$  protein in the gonads during development is shown in Figure 4. The presence of ER $\beta$  as early as PND 5 in the ovary (**C**) followed the differentiation of granulosa cells, with the most abundant protein expression seen at PND 26 (**G**). The protein was localized to the nucleus of the granulosa cells of primary, secondary, and tertiary follicles. No immunostaining

FIG. 5. Immunohistochemical analysis of ER $\alpha$  and ER $\beta$  in the PND 26 female reproductive tract. Intense ER $\alpha$  immunolocalization is seen in both epithelial and stromal cells of both the oviduct (A) and the uterus (C). However, ER $\beta$  immunostaining was not detected in either the oviduct (B) or the uterus (D).

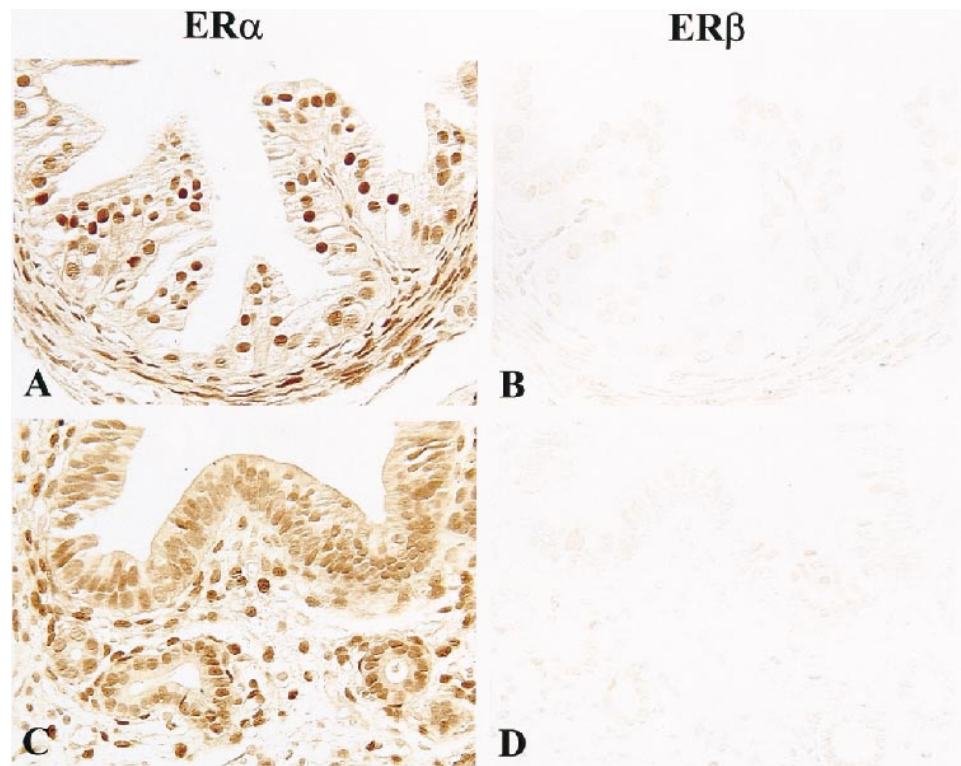

of ER $\beta$  was seen in the interstitial cells of the ovary. Adjacent tissue sections immunostained for the presence of ER $\alpha$  exhibited specific staining in the interstitial cells of the ovary at all ages examined (data not shown). The presence of ER $\beta$  protein in the testis was observed in the germ cells as early as 16 dpc (B). The most abundant ER $\beta$  expression appeared at PND 12 in spermatocytes (F), after which the intensity decreased and was not apparent by PND 26 (H). Adjacent tissue sections immunostained for the presence of ER $\alpha$  indicated immunoreactivity in the interstitial cells of the testis at all ages examined (data not shown).

Immunostaining for both ER proteins was also determined in the female reproductive tract during development. ER $\alpha$  immunoreactivity was observed in all time points tested as previously reported [7]. ER $\alpha$  was detected in stromal cells of the uterus at all ages examined and in the epithelial cells as early as PND 5 and throughout the rest of development. There was no detectable expression of ER $\beta$  protein in the uterus at any time point examined even though levels of ER $\beta$  mRNA were seen at PND 1. An example of immunohistochemical localization of ER $\alpha$  and ER $\beta$  in the female reproductive tract can be seen in Figure 5. At PND 26, intense ER $\alpha$  immunoreactivity can be seen in the oviduct (A) and the uterus (C) in both epithelial and stromal cells. In contrast, ER $\beta$  immunoreactivity was not detectable in either the oviduct (B) or the uterus (D) in either cell type.

A comparison of ER $\alpha$  and ER $\beta$  immunoreactivity in the male reproductive tract at 12 days of age is shown in Figure 6. The epididymis exhibited strong ER $\alpha$  immunostaining in epithelial cells and light immunostaining in stromal cells (A); ER $\beta$  immunostaining was easily detectable in stromal cells and epithelial cells (B). The presence of both receptor forms in vas deferens was not as intense as in the epididymis; ER $\alpha$  was predominantly present in stromal cells (C), and ER $\beta$  was predominantly seen in epithelial cells (D).

Seminal vesicles exhibited no detectable ER $\alpha$  immunoreactivity (E) although ER $\alpha$  mRNA was present in the RPA. ER $\beta$  immunoreactivity appeared in the epithelial cells of the seminal vesicle, but at a low level (F). The reproductive tract (seminal colliculus) exhibited immunostaining for ER $\alpha$  in the stromal cells (G) and for ER $\beta$  in the epithelial cells (H).

## DISCUSSION

The ontogeny of ER $\alpha$  and ER $\beta$  was mapped in developing male and female mouse reproductive tracts. Fetal, neonatal, and immature female reproductive tract tissues exhibited an overall expression pattern of ER $\alpha$  and ER $\beta$  mRNAs that was similar to that reported in the adult [4]. In the ovary, ER $\alpha$  immunoreactivity was present in the interstitial cells, whereas ER $\beta$  immunoreactivity was seen in granulosa cells. ER $\beta$  levels in the ovary appeared to increase with age and the onset of follicular maturation, which involved increases in the granulosa cell population. An increase in cellular ER $\beta$  staining intensity indicated that the level of expression per cell was also increasing with age. The developing uterus showed an abundant amount of ER $\alpha$  in both stromal cells and epithelial cells but little or no expression of ER $\beta$ . Although a weak signal for ER $\beta$  mRNA was detected in the uterus in the neonatal mouse, specific immunoreactivity could not be detected by the methods used in this study. The general lack of detection of ER $\beta$  in the uterus is confirmed by the lack of function demonstrated by the uterine phenotypes described in ER $\alpha$  [28] and ER $\beta$  [29] knock-out mice.

Of particular significance was the presence of ER $\beta$  in the testis of fetal and neonatal mice, which was in contrast to the lack of expression we previously reported in adult mice [4]. In the current study, the developing testis contained ER $\beta$  immunoreactivity in the spermatocytes, but



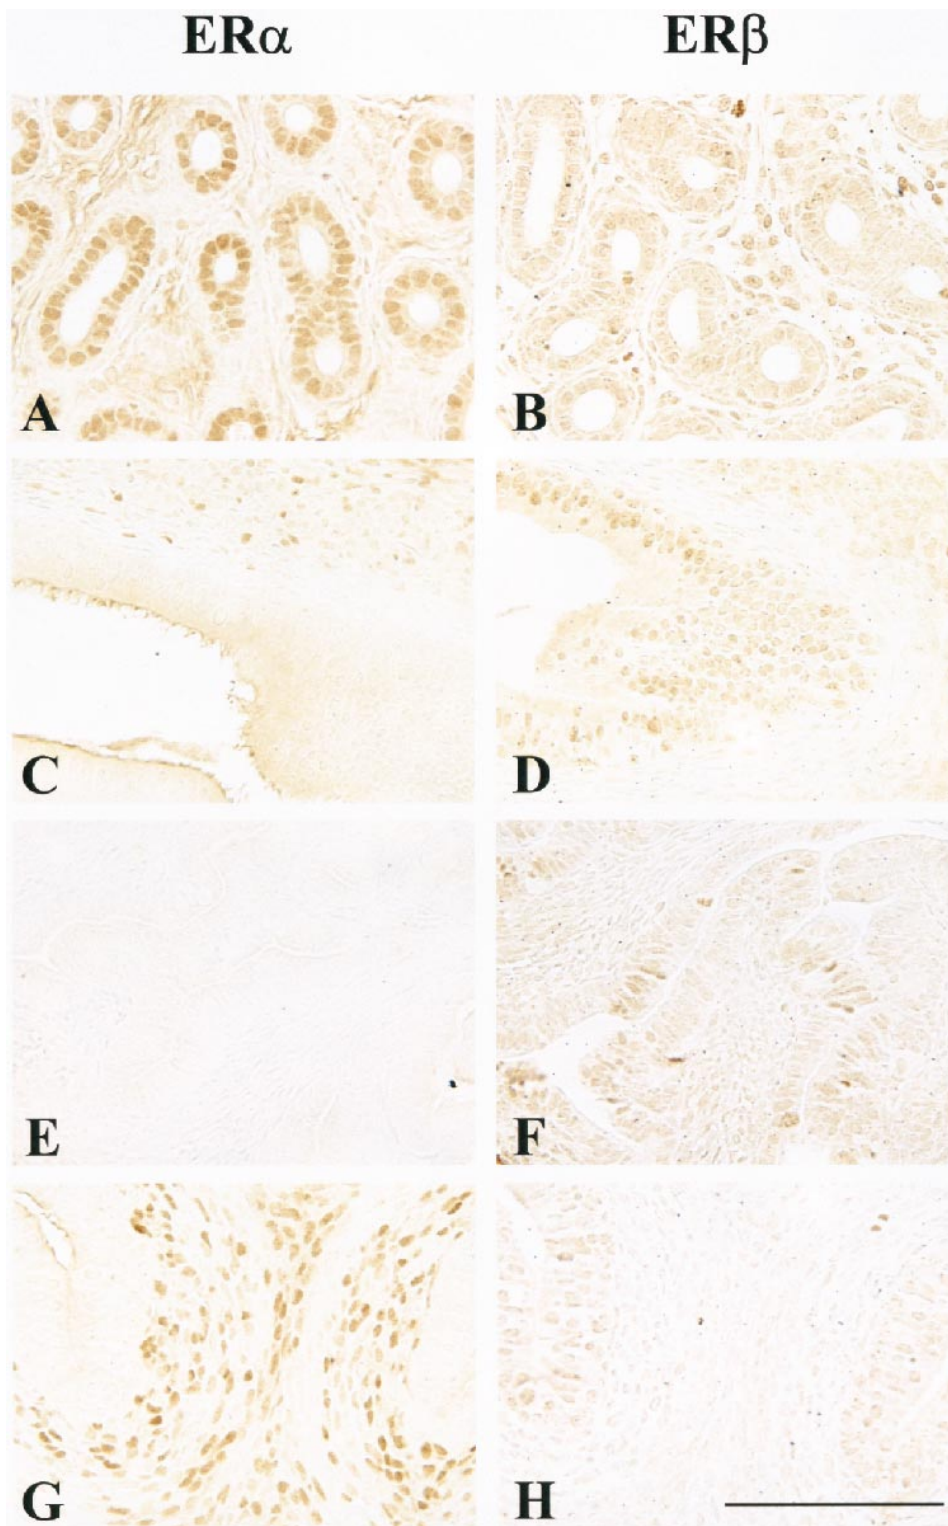

FIG. 6. Immunohistochemical analysis of ER $\alpha$  and ER $\beta$  in the PND 12 male reproductive tract. **A,B**) Epididymis, with localization of ER $\alpha$  predominantly in the epithelial cells with some protein in the stromal cells, and ER $\beta$  immunostaining in both stromal and epithelial cells. **C,D**) Vas deferens, with localization of ER $\alpha$  predominantly in the stromal cells and ER $\beta$  in the epithelial cells. **E,F**) Seminal vesicle, with ER $\beta$  protein found in the epithelial cells and no apparent ER $\alpha$  protein. **G,H**) Seminal colliculus, with ER $\alpha$  predominantly expressed in the stromal cells and ER $\beta$  showing a light immunostaining in the epithelial cells. The bar in **H** represents 100  $\mu$ m, and all images are shown at the same magnification.

the immature testis showed no apparent ER $\beta$  immunoreactivity. ER $\alpha$  immunoreactivity was constitutively expressed in interstitial cells at all ages examined. By PND 26, the expression of ER $\beta$  in the testis diminished to undetectable levels when assayed by both RPA and immunohistochemistry. Thus, ER $\beta$  expression is apparently dependent on the stage of differentiation of the gonadocytes and disappears as the animal matures. Rosenfeld et al. [11] reported ER $\beta$  in Leydig cells of adult mice, a finding not consistent with our findings by either RPA or protein lo-

calization; however, they used a C57Bl/6J/129 mouse while we used an outbred CD-1 strain. Strain differences and different ages examined may account for the differences.

The relationship of ER $\beta$  message and protein mapped during development in the testis was interesting. The peak of ER $\beta$  mRNA occurred at PND 5 while the peak of immunoreactivity occurred at PND 12. Similar delays in translation of mRNA into protein have been reported for other transcripts found during oogenesis [30] and sper-

matogenesis [31]. During spermatogenesis, cessation of transcription occurs within germ cells at certain stages of differentiation; apparently, it is necessary to synthesize and store mRNAs before their translation later during spermatogenesis [32]. For example, transcripts have been shown to be repressed during male germ cell differentiation by repressor proteins for several days before translation; protamine 1 mRNA was repressed by prm-1 RNA-binding protein [33]. Also, the developmental regulation of RNA binding proteins during spermatogenesis, like testis-brain RNA-binding protein, showed that mRNA translation could be regulated by proteins expressed during critical stages of development [34]. The mechanism of translational repression has been reviewed and is considered essential for normal spermatogenesis; premature translation of some of these mRNAs has been suggested to cause an arrest in spermatid differentiation resulting in male sterility [31]. The presence of ER $\beta$  in the neonatal mouse testis during critical periods of development could play an important role in normal differentiation. Any delay in the initial transcription or premature translation of the mRNA into protein could result in permanent alterations in the differentiation of the testis. Studies are currently underway to examine the mRNA levels as well as the protein expression of ER $\beta$  in the testis following neonatal exposure to exogenous estrogens.

The finding of ER $\beta$  only in spermatocytes of the neonatal mouse testis is in contrast to reports in the developing rat testis by Saunders et al. [18] and van Pelt et al. [35] showing ER $\beta$  in multiple cell types including Sertoli and peritubular cells. Both mice and rats, however, showed ER $\beta$  in spermatocytes in developing testis. The differences in mRNA and other protein cell types in the testis may be due to species differences, or to the antibody and procedures used for detection of the protein. The conflicting data in ER $\beta$  localization between the rat studies, specifically the differences seen in cell type distribution in the testis, are more striking than the differences between rat and mouse.

Tissues of the male reproductive tract exhibited expression of both receptor forms throughout development, similar to expression described in adults [4,9,10]. The developing male reproductive tract generally demonstrated the presence of both receptors in epithelial cells or stromal cells within a particular tissue. However, the seminal vesicle expressed ER $\beta$  immunoreactivity in epithelial cells but no detectable ER $\alpha$  immunoreactivity in either tissue compartment. This is in contrast to our RPA data that showed the presence of ER $\alpha$  in the seminal vesicles. Since ER $\alpha$  immunoreactivity was seen in the coagulating gland, ER $\alpha$  transcripts were probably contributed by this tissue, which was collected with the seminal vesicles for RNA analysis. Additional studies will be necessary to verify this possibility. The epididymis appeared to be the only tissue that shows the presence of both receptors colocalized in the same cell type. A gradient of ER $\alpha$  expression in the epithelial cells of the epididymis was apparent and agrees with that previously described at the RNA level [9,12,36]; highest expression was observed in the initial segment. ER $\beta$  expression also appeared to be higher in some areas of the epididymis than others. A more comprehensive study of the expression pattern within different segments of the epididymis is warranted to determine the specific receptor content throughout the epididymis. This gradient of expression of both receptors within the epididymis is not understood, but differential effects of estrogens

through each receptor may be studied using this tissue. Effects demonstrated in one section or the other of the epididymis may be a key in understanding the mechanism of action of various exogenous estrogens on one receptor or the other.

The differences in tissue and cellular expression, as well as the appearance and disappearance of the two receptors, may play an important role in development and differentiation. Further, these differences may help explain the varied effects of exposure to different environmental estrogens at different stages of development. Specifically, the affinity of a compound for one receptor or the other may direct the adverse effects of that estrogen on certain tissues within the reproductive tract and be unique for a particular stage of developmental exposure. For example, since genistein preferentially binds to ER $\beta$  [25] and expression of ER $\beta$  is high in the ovary, this compound may cause changes in the ovary at doses lower than another estrogen that binds more efficiently to ER $\alpha$ . Studies are underway to test this hypothesis.

The presence of these two estrogen receptor subtypes in various tissues and their distribution in different cellular compartments adds further complexity to understanding of the role of estrogens in the developing animal. It is of interest to note that a recent publication [37] reported ER $\beta$  to be the dominant receptor subtype in the adult rat ovary and further localized it in the granulosa cells, which is in agreement with our findings in the developing mouse ovary. These investigators demonstrated that the ER $\beta$  protein was functional and was regulated by ovulatory doses of gonadotropins [37]. This suggests that the ER $\beta$  subtype most likely is a mediator of estrogen action in rodent granulosa cells during normal follicular development. The subfertility and ovarian dysfunction described in the ER $\beta$  knockout mice further suggests this hypothesis [29]. Therefore, the possibility now exists that ER $\beta$  may be involved in effects of various exogenous estrogens, particularly those that preferentially bind to ER $\beta$ . Experiments are underway in our laboratory to address this possibility. In summary, the data described in this report of normal developmental expression of the two receptor subtypes can be used as a map to further investigate abnormal differentiation of mice developmentally exposed to various environmental xenoestrogens.

## ACKNOWLEDGMENTS

The authors would like to acknowledge Dr. Gregg Richards and Dr. Donna Bunch for their critical review and comments on this manuscript. The authors would also like thank Dr. Bill Bullock for consultations in pathology.

## REFERENCES

1. Mangelsdorf DJ, Thummel C, Beato M. The nuclear receptor superfamily: the second decade. *Cell* 1995; 83:835–839.
2. Kuiper GG, Enmark E, Peltö-Huikko M, Nilsson S, Gustafsson JÅ. Cloning of a novel receptor expressed in rat prostate and ovary. *Proc Natl Acad Sci USA* 1996; 93:5925–5930.
3. Mosselman S, Polman J, Dijkema R. ER beta: identification and characterization of a novel human estrogen receptor. *FEBS Lett* 1996; 392: 49–53.
4. Couse JF, Lindzey J, Grandien K, Gustafsson JÅ, Korach KS. Tissue distribution and quantitative analysis of estrogen receptor-alpha (ER-alpha) and estrogen receptor-beta (ER-beta) messenger ribonucleic acid in the wild-type and ER-alpha-knockout mouse. *Endocrinology* 1997; 138:4613–4621.
5. Bradenberger A, Tee M, Lee J, Chao V, Jaffe R. Tissue distribution of estrogen receptors alpha (ER-alpha) and beta (ER-beta) mRNA in

- the midgestational human fetus. *J Clin Endocrinol Metab* 1997; 82: 3509–3512.
6. Kuiper GG, Gustafsson JÅ. The novel estrogen receptor-beta subtype: potential role in the cell- and promoter-specific actions of estrogens and anti-estrogens. *FEBS Lett* 1997; 410:87–90.
  7. Yamashita S, Newbold RR, McLachlan JA, Korach KS. The role of the estrogen receptor in uterine epithelial proliferation and cytodifferentiation in neonatal mice. *Endocrinology* 1990; 127:2456–2463.
  8. Bigsby RM, Li AX, Luo K, Cunha GR. Strain differences in the ontogeny of estrogen receptors in murine uterine epithelium. *Endocrinology* 1990; 126:2592–2596.
  9. Cooke PS, Young P, Hess RA, Cunha GR. Estrogen receptor expression in developing epididymis, efferent ductules, and other male reproductive organs. *Endocrinology* 1991; 128:2874–2879.
  10. Greco TL, Duello TM, Gorski J. Estrogen receptors, estradiol, and diethylstilbestrol in early development: the mouse as a model for the study of estrogen receptors and estrogen sensitivity in embryonic development of male and female reproductive tracts. *Endocr Rev* 1993; 14:59–71.
  11. Rosenfeld CS, Ganjam VK, Taylor JA. Transcription and translation of estrogen receptor-beta in the male reproductive tract of estrogen receptor-alpha knock-out and wild-type mice. *Endocrinology* 1998; 139:2982–2987.
  12. Hess RA, Gist DH, Bunick D. Estrogen receptor (alpha and beta) expression in the excurrent ducts of the adult male rat reproductive tract. *J Androl* 1997; 18:602–611.
  13. Saunders PT, Maguire SM, Gaughan J, Millar MR. Expression of oestrogen receptor beta (ER beta) in multiple rat tissues visualized by immunohistochemistry. *J Endocrinol* 1997; 154:R13–16.
  14. Byers M, Kuiper GG, Gustafsson JÅ, Park-Sarge OK. Estrogen receptor-beta mRNA expression in rat ovary: down-regulation by gonadotropins. *Mol Endocrinol* 1997; 11:172–182.
  15. Rosenfeld CS, Yuan X, Manikkam M, Calder MD, Garverick HA, Lubahn DB. Cloning, sequencing, and localization of bovine estrogen receptor-beta within the ovarian follicle. *Biol Reprod* 1999; 60:691–697.
  16. Enmark E, Peltö-Huikko M, Grandien K. Human estrogen receptor beta-gene structure, chromosomal localization, and expression pattern. *J Clin Endocrinol Metab* 1997; 82:4258–4265.
  17. Prins GS, Marmer M, Woodham C. Estrogen receptor-beta messenger ribonucleic acid ontogeny in the prostate of normal and neonatally estrogenized rats. *Endocrinology* 1998; 139:874–883.
  18. Saunders PT, Fisher JS, Sharpe RM, Millar MR. Expression of oestrogen receptor beta (ER beta) occurs in multiple cell types, including some germ cells, in the rat testis. *J Endocrinol* 1998; 156:R13–17.
  19. Sar M, Welsch F. Differential expression of estrogen receptor-beta and estrogen receptor-alpha in the rat ovary. *Endocrinology* 1999; 140: 963–971.
  20. Lemmen JG, Broekhof JL, Kuiper GG, Gustafsson J, van der Saag PT, van der Burg B. Expression of estrogen receptor alpha and beta during mouse embryogenesis. *Mech Dev* 1999; 81:175–179.
  21. McLachlan JA, Newbold RR, Bullock BC. Long-term effects on the female mouse genital tract associated with prenatal exposure to diethylstilbestrol. *Cancer Res* 1980; 40:3988–3999.
  22. Newbold RR, Bullock BC, McLachlan JA. Uterine adenocarcinoma in mice following developmental treatment with estrogens: a model for hormonal carcinogenesis. *Cancer Res* 1990; 50:7677–7681.
  23. Newbold RR, Hanson RB, Jefferson WN, Bullock BC, Haseman J, McLachlan JA. Increased tumors but uncompromised fertility in the female descendants of mice exposed developmentally to diethylstilbestrol. *Carcinogenesis* 1998; 19:1655–1663.
  24. Tremblay GB, Tremblay A, Copeland NG, Gilbert DJ, Jenkins NA, Labrie F, Giguere V. Cloning, chromosomal localization, and functional analysis of the murine estrogen receptor beta. *Mol Endocrinol* 1997; 11:353–365.
  25. Kuiper GG, Lemmen JG, Carlsson B. Interaction of estrogenic chemicals and phytoestrogens with estrogen receptor beta. *Endocrinology* 1998; 139:4252–4263.
  26. Sun J, Meyers M, Fink B, Rajendran R, Katzenellenbogen J, Katzenellenbogen B. Novel ligands that function as selective estrogens or antiestrogens for estrogen receptor-alpha or estrogen receptor-beta. *Endocrinology* 1999; 140:800–804.
  27. Davis V, Couse J, Goulding E, Power S, Eddy E, Korach K. Aberrant reproductive phenotypes evident in transgenic mice expressing the wild-type mouse estrogen receptor. *Endocrinology* 1994; 135:379–386.
  28. Lubahn DB, Moyer JS, Golding TS, Couse JF, Korach KS, Smithies O. Alteration of reproductive function but not prenatal sexual development after insertional disruption of the mouse estrogen receptor gene. *Proc Natl Acad Sci USA* 1993; 90:11162–11166.
  29. Kreye JH, Hodgins JB, Couse JF, Enmark E, Warner M, Mahler JF, Sar M, Korach KS, Gustafsson JÅ, Smithies O. Generation and reproductive phenotypes of mice lacking estrogen receptor beta. *Proc Natl Acad Sci USA* 1998; 95:15677–15682.
  30. Richter JD. Translational control during early development. *Bioessays* 1991; 13:179–183.
  31. Braun RE. Post-transcriptional control of gene expression during spermatogenesis. *Semin Cell Dev Biol* 1998; 9:483–489.
  32. Hecht NB. The making of a spermatozoon: a molecular perspective. *Dev Genet* 1995; 16:95–103.
  33. Lee K, Fajardo MA, Braun RE. A testis cytoplasmic RNA-binding protein that has the properties of a translational repressor. *Mol Cell Biol* 1996; 16:3023–3034.
  34. Gu W, Wu XQ, Meng XH, Morales C, el-Alfy M, Hecht NB. The RNA- and DNA-binding protein TB-RBP is spatially and developmentally regulated during spermatogenesis. *Mol Reprod Dev* 1998; 49:219–228.
  35. van Pelt AM, de Rooij DG, van der Burg B, van der Saag PT, Gustafsson JÅ, Kuiper GG. Ontogeny of estrogen receptor-beta expression in rat testis. *Endocrinology* 1999; 140:478–483.
  36. Iguchi T, Uesugi Y, Sato T, Ohta Y, Takasugi N. Developmental pattern of estrogen receptor expression in male mouse genital organs. *Mol Androl* 1991; 6:109–119.
  37. Fitzpatrick SL, Funkhouser JM, Sindoni DM, Stevis PE, Deecher DC, Bapat AR, Merchenthaler I, Frail DE. Expression of estrogen receptor  $\beta$  protein in rodent ovary. *Endocrinol* 1999; 140:2581–2591.
